# Supplementary material
Source: PubMed Central journal article supplement (PMC2806488)
Supplement: NIHMS144698-supplement-supplement_1.pdf [file NIHMS144698-supplement-supplement_1.pdf]

Type of file: table

Label: Supplemental Table 1a

Filename: supplemental\_table.doc

Table 1a. Spearman Correlations of Early Risk Factors with School-Age Inhibition Scores at Each Assessment

| School-Age Inhibition Scores <sup>a</sup>              |         |         |         |         |         |
|--------------------------------------------------------|---------|---------|---------|---------|---------|
|                                                        | Grade 1 | Grade 3 | Grade 5 | Grade 7 | Grade 9 |
| Child gender<br>(0 = boys; 1 = girls)                  | .222 ** | .278 ** | .212 ** | .256 ** | .134 *  |
| Exposure to maternal stress,<br>birth to age 4.5 years | .121 +  | .177 ** | .120 +  | .175 ** | .219 ** |
| Observed behavioral<br>inhibition, age 4.5 years       | .317 ** | .300 ** | .153 *  | .157 *  | .161 *  |
| Afternoon basal cortisol<br>levels, age 4.5 years      | .214 ** | .253 ** | .213 ** | .114 +  | .069    |

N = 238

<sup>a</sup> First PCA component scores as described in Measures section.

+  $p < .10$ ; \*  $p < .05$ ; \*\*  $p < .01$
